# Supplementary material for: Motility-induced collapse of an active Brownian particle polymer chain
Source: Royal Society of Chemistry journal article supplement (doi:10.1039/d4cp03731f), 2024-12-10
Supplement: d4cp03731f1.pdf [file d4cp03731f1.pdf]

## SUPPLEMENTARY INFORMATION

### Motility-induced collapse of active Brownian particle polymer chain

Aleksandr Buglakov <sup>1,2,\*</sup>, Vasilisa Lelecova <sup>1,2</sup>, Aleksandr Chertovich <sup>1,2</sup>

1. Semenov Federal Research Center for Chemical Physics, Kosygina, 4, 119991 Moscow, Russia
2. Lomonosov Moscow State University, Leninskie gory 1, 119991 Moscow, Russia

\*corresponding author's e-mail: buglakov@polly.phys.msu.ru

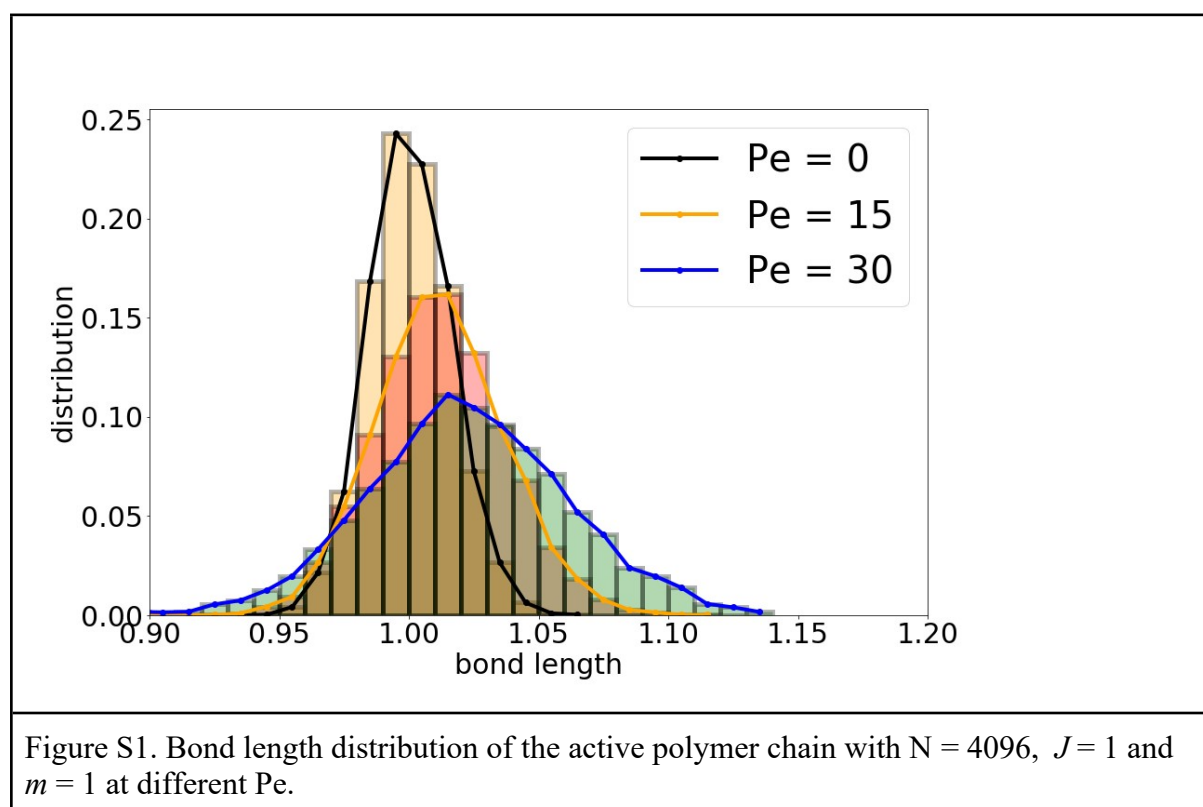

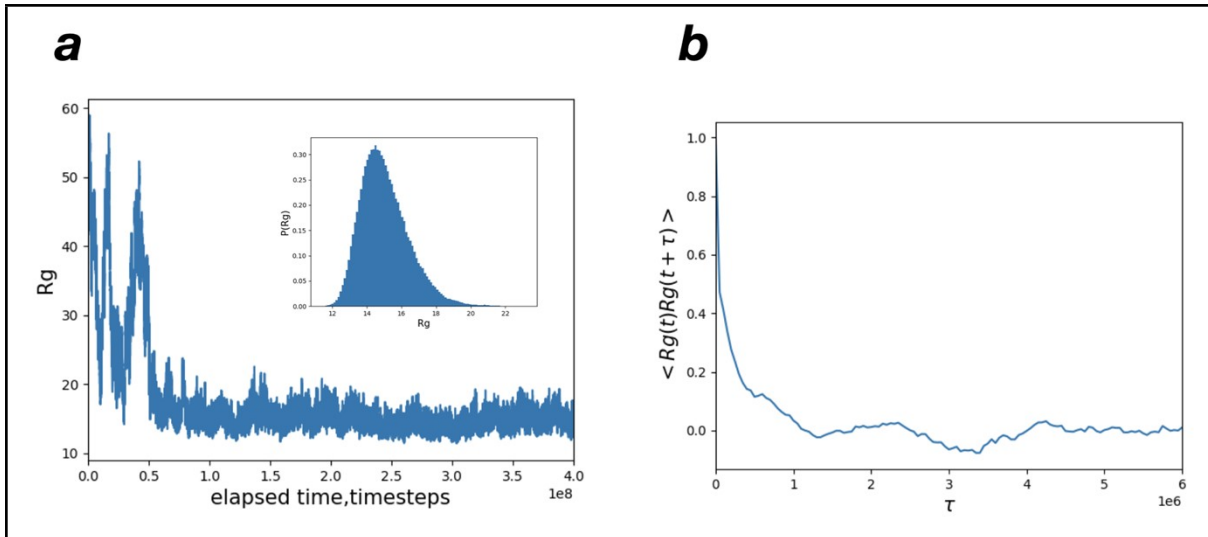

Figure S2. Typical dependence of active polymer size  $R_g$  on simulation time with  $N = 4096$  and  $Pe = 20$ . Inset shows density distribution of  $R_g$ , obtained within  $R_g(t)$  plateau and collected over several independent runs (a).  $\langle R_g(t)R_g(t+\tau) \rangle$  autocorrelation function for  $N = 4096$  and  $Pe = 20$  (b).

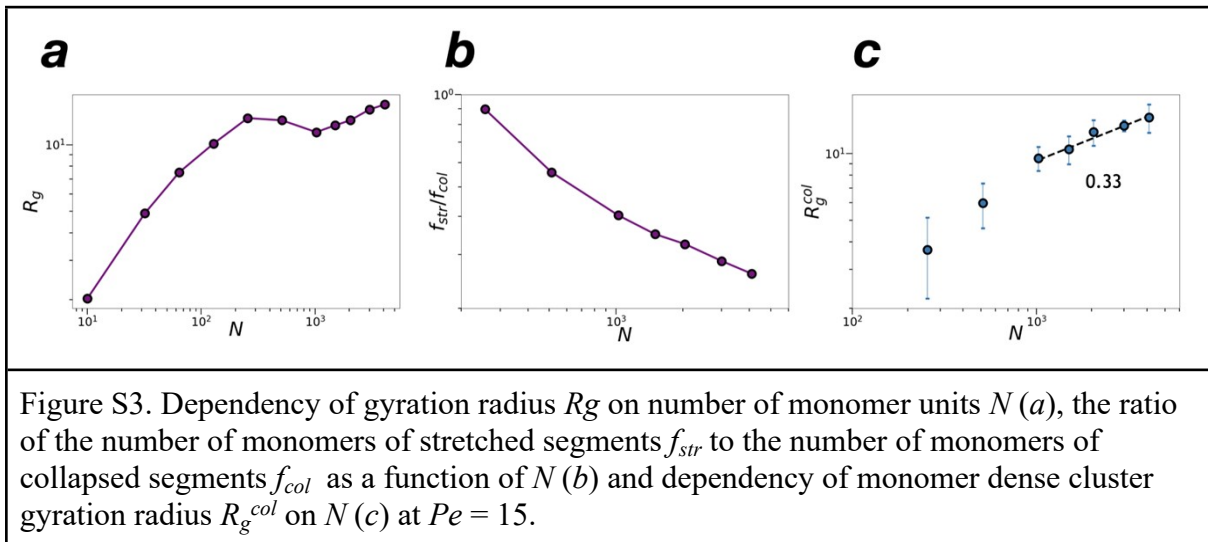

Figure S3. Dependency of gyration radius  $R_g$  on number of monomer units  $N$  (a), the ratio of the number of monomers of stretched segments  $f_{str}$  to the number of monomers of collapsed segments  $f_{col}$  as a function of  $N$  (b) and dependency of monomer dense cluster gyration radius  $R_g^{col}$  on  $N$  (c) at  $Pe = 15$ .

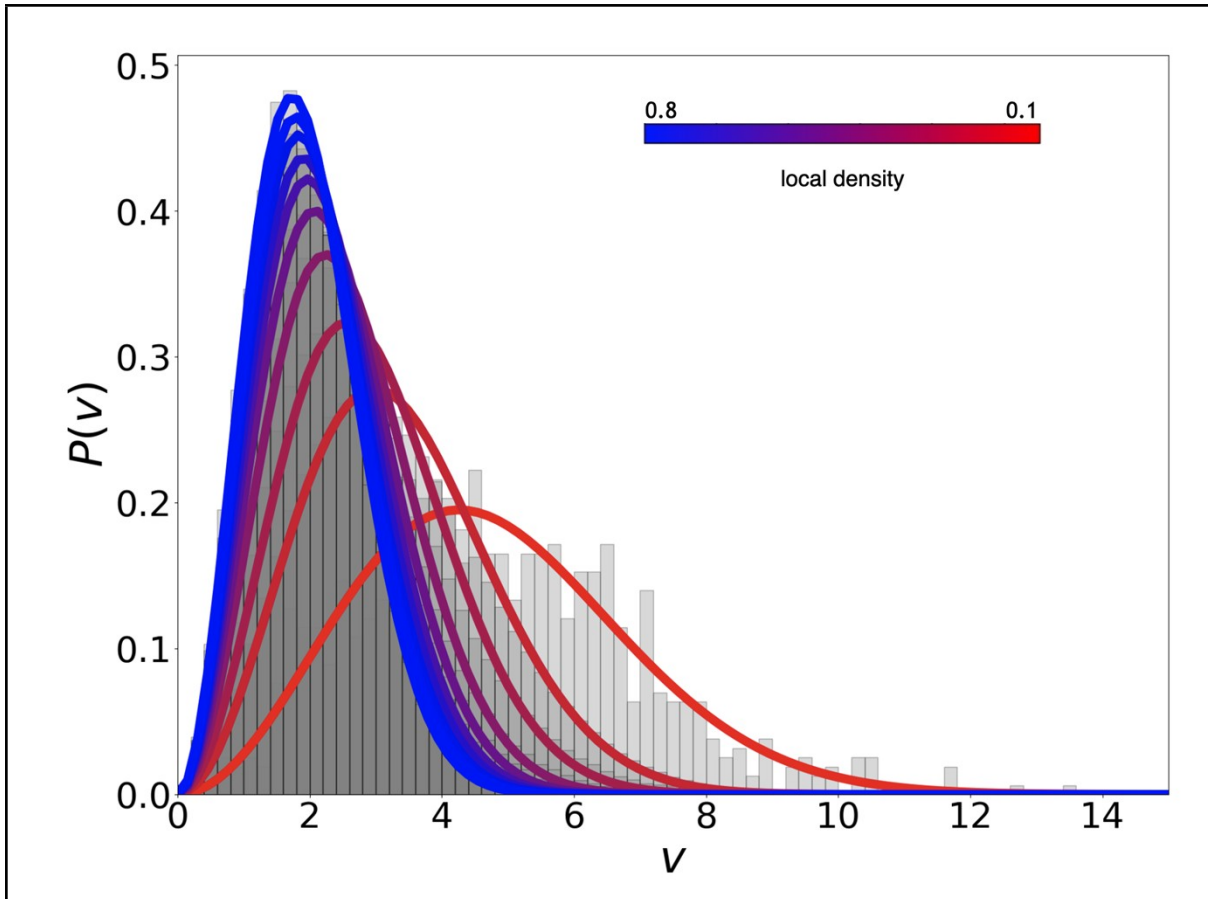

Figure S4. Full set of normalized velocity distributions  $P(v)$  of underdamped  $N = 4096$  active chain with  $Pe = 15$  for different local densities, approximated with Maxwell-Boltzman velocity functions.

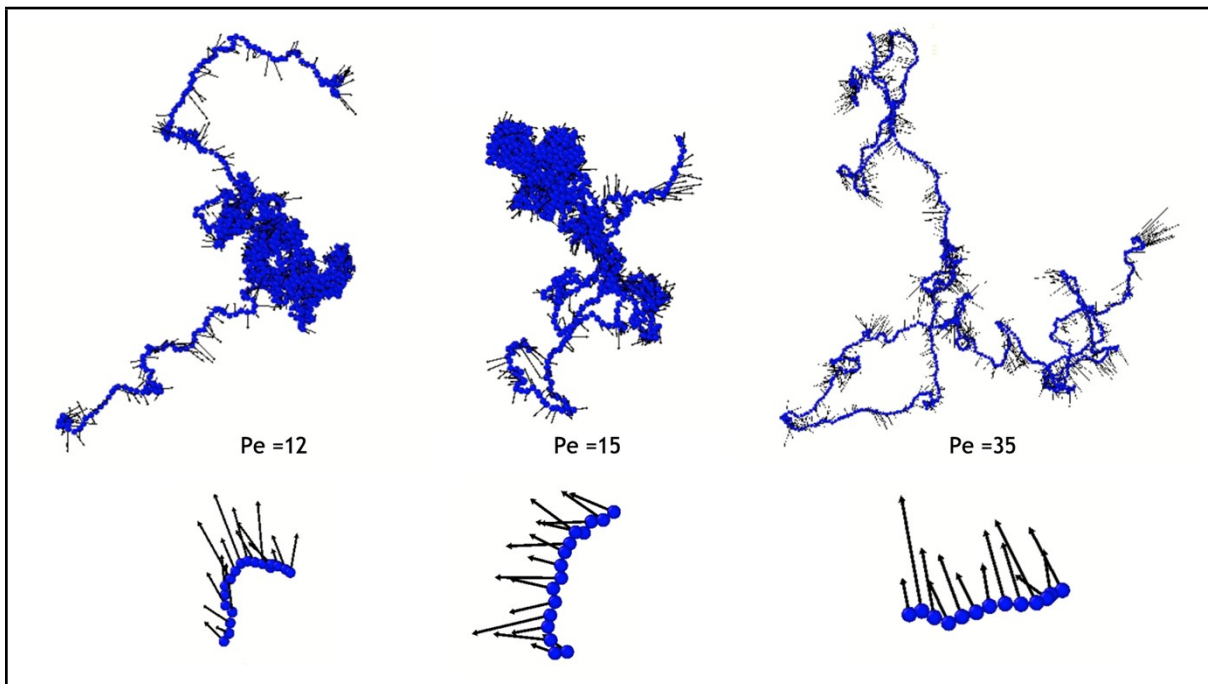

Fig. S5. Typical snapshots of the active chain with  $N = 1024$ , showing amplitudes and directions of the monomer units velocities (black arrows).

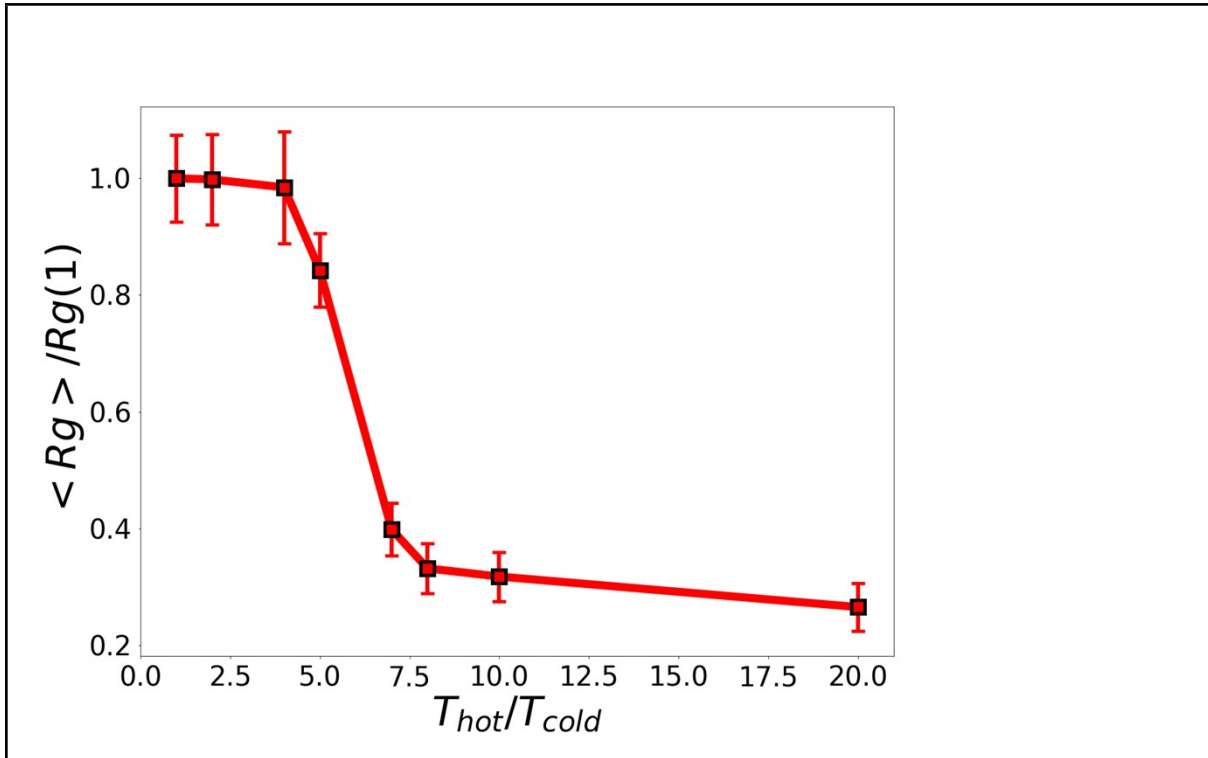

Figure S6. Reduced gyration radius  $Rg$  dependence on  $T_{hot}/T_{cold}$  for the  $[A_{20}B_{80}]_{10}A_{20}$  regularly alternating copolymer with A - hot segments of length 20 and B - cold segments ( $T_{cold} = 1$ ) of length 80.

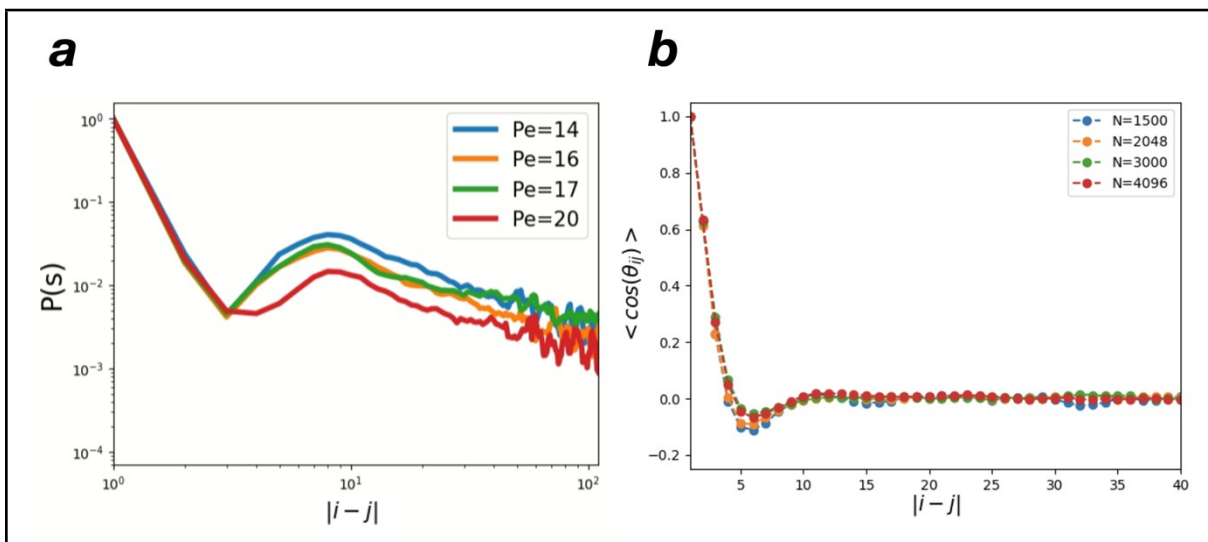

Figure S7. Contact probability  $P$  on contour distance along the chain  $s = |i-j|$  for collapsed

segments for different  $Pe$  within collapsed conformation region of  $N = 4096$  active polymer chain (a); Bond-bond autocorrelation function along the chain ( $\langle \cos \theta_{ij} \rangle$ , where  $\theta_{ij}$  is angle between ) with  $N = 4096$  and  $Pe = 15$ .
